# Supplementary material for: Meals with Similar Fat Content from Different Dairy Products Induce Different Postprandial Triglyceride Responses in Healthy Adults: A Randomized Controlled Cross-Over Trial
Source: PubMed Central journal article supplement — J Nutr. 2019 Feb 13;149(3):422–31. doi: 10.1093/jn/nxy291 (PMC6398384; doi:10.1093/jn/nxy291), 2019-02-13
Supplement: nxy291_supplemental_file.pdf [file nxy291_supplemental_file.pdf]

## Supplementary data

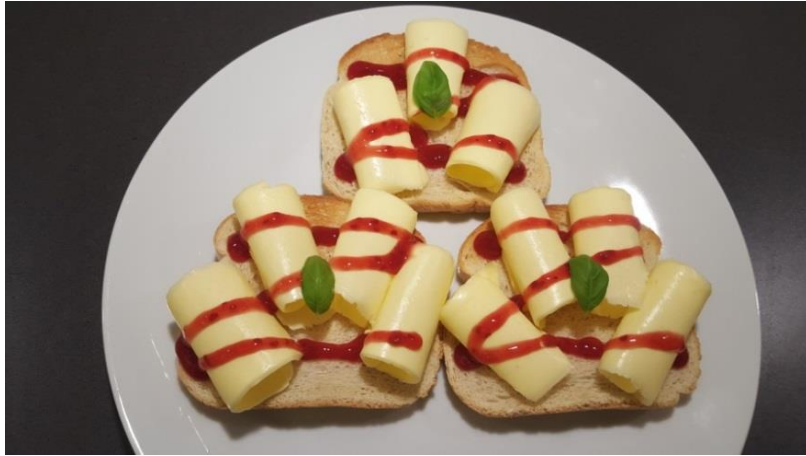

Butter meal

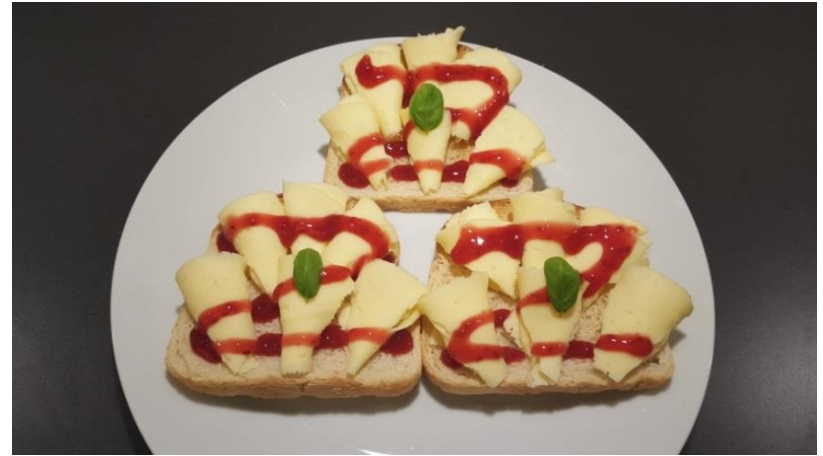

Cheese meal

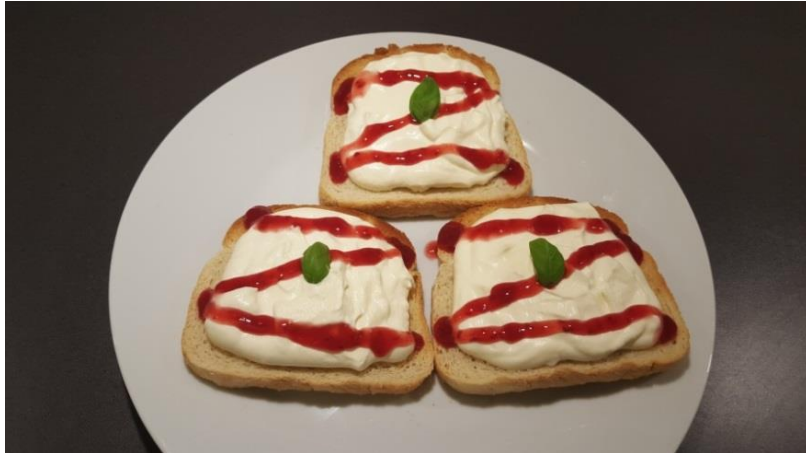

Whipped cream meal

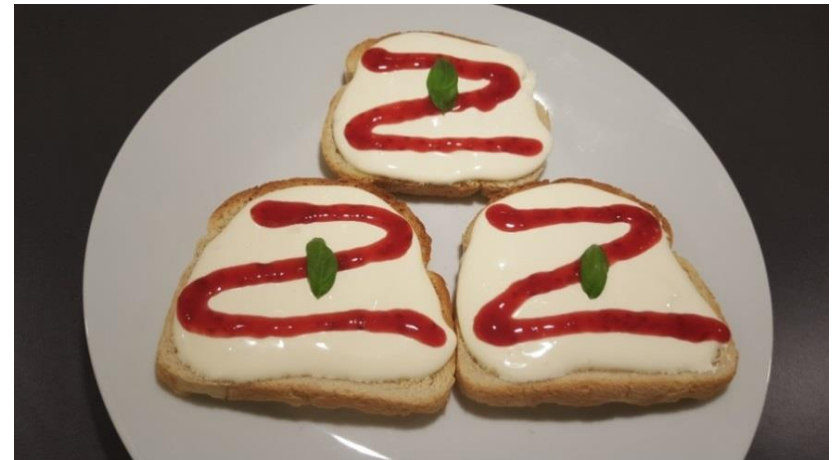

Sour cream meal

**Supplemental Figure 1.** Pictures of the dairy meals used in the study

## Supplementary data

**Supplemental Table 1.** Fatty acid composition (% of total) of the dairy products<sup>1</sup>

| <b>Fatty acid</b>        | <b>Butter</b>    | <b>Cheese</b>    | <b>Whipped cream</b> | <b>Sour cream</b> |
|--------------------------|------------------|------------------|----------------------|-------------------|
| 4:0                      | 4.1 (4.1-4.2)    | 4.2 (4.2-4.3)    | 4.1 (4.0-4.1)        | 4.1 (4.1-4.2)     |
| 6:0                      | 2.5 (2.4-2.5)    | 2.5 (2.4-2.6)    | 2.5 (2.4-2.5)        | 2.5 (2.4-2.6)     |
| 8:0                      | 1.4 (1.4-1.4)    | 1.4 (1.4-1.5)    | 1.5 (1.4-1.5)        | 1.4 (1.4-1.5)     |
| 10:0                     | 3.0 (3.0-3.1)    | 3.0 (2.9-3.3)    | 3.2 (3.1-3.2)        | 3.1 (3.0-3.3)     |
| 12:0                     | 3.4 (3.4-3.4)    | 3.3 (3.1-3.7)    | 3.6 (3.5-3.7)        | 3.4 (3.2-3.6)     |
| 14:0                     | 11.2 (11.1-11.2) | 10.7 (10.1-11.6) | 11.5 (11.1-11.7)     | 11.0 (10.4-11.5)  |
| 14:1cis-9                | 1.1 (1.1-1.1)    | 1.0 (1.0-1.1)    | 1.1 (1.1-1.2)        | 1.1 (1.0-1.1)     |
| 15:0                     | 0.9 (0.9-0.9)    | 0.9 (0.8-0.9)    | 1.0 (0.9-1.0)        | 0.9 (0.9-0.9)     |
| 16:0                     | 31.4 (31.0-31.8) | 29.5 (28.8-30.2) | 29.6 (28.8-30.4)     | 28.6 (27.1-29.7)  |
| 16:1cis-9                | 1.2 (1.2-1.3)    | 1.3 (1.2-1.4)    | 1.3 (1.3-1.3)        | 1.3 (1.2-1.3)     |
| 17:0                     | 0.5 (0.5-0.5)    | 0.5 (0.5-0.5)    | 0.5 (0.5-0.5)        | 0.5 (0.5-0.6)     |
| 18:0                     | 10.6 (10.5-10.7) | 10.7 (10.4-11.0) | 10.8 (10.5-11.0)     | 11.0 (10.7-11.5)  |
| 18:1trans-9              | 0.2 (0.2-0.2)    | 0.2 (0.2-0.2)    | 0.2 (0.2-0.2)        | 0.2 (0.2-0.2)     |
| 18:1trans-10             | 0.3 (0.3-0.3)    | 0.3 (0.3-0.3)    | 0.2 (0.2-0.3)        | 0.3 (0.2-0.3)     |
| 18:1trans-11             | 1.1 (1.0-1.2)    | 1.4 (1.3-1.5)    | 1.2 (1.1-1.3)        | 1.3 (1.1-1.5)     |
| 18:1cis-9                | 20.0 (19.7-20.1) | 21.2 (19.5-22.5) | 20.4 (19.6-21.3)     | 21.5 (20.2-22.9)  |
| 18:1cis-11               | 0.7 (0.7-0.7)    | 0.8 (0.7-0.8)    | 0.7 (0.7-0.7)        | 0.7 (0.7-0.8)     |
| 18:2n-6                  | 1.5 (1.4-1.6)    | 1.7 (1.6-1.8)    | 1.5 (1.5-1.6)        | 1.6 (1.6-1.8)     |
| 18:3n-3                  | 0.4 (0.4-0.4)    | 0.5 (0.4-0.5)    | 0.5 (0.4-0.5)        | 0.5 (0.4-0.6)     |
| 18:2cis-9-trans-11 (CLA) | 0.5 (0.5-0.5)    | 0.7 (0.6-0.7)    | 0.5 (0.5-0.6)        | 0.6 (0.5-0.7)     |
| 20:0                     | 0.1 (0.1-0.2)    | 0.2 (0.1-0.2)    | 0.2 (0.2-0.2)        | 0.2 (0.2-0.2)     |
| 20:4n-6 (ARA)            | 0.1 (0.1-0.1)    | 0.1 (0.1-0.1)    | 0.1 (0.1-0.1)        | 0.1 (0.1-0.1)     |
| 20:5n-3 (EPA)            | 0.1 (0.1-0.1)    | 0.1 (0.1-0.1)    | 0.1 (0.1-0.1)        | 0.1 (0.1-0.1)     |
| 22:5n-3 (DPA)            | 0.1 (0.1-0.1)    | 0.1 (0.1-0.1)    | 0.1 (0.1-0.1)        | 0.1 (0.1-0.1)     |
| 22:6n-3 (DHA)            | 0.0 (0.0-0.0)    | 0.0 (0.0-0.0)    | 0.0 (0.0-0.0)        | 0.0 (0.0-0.0)     |
| Unknown                  | 3.7 (3.6-3.9)    | 3.7 (3.5-3.8)    | 3.9 (3.8-4.0)        | 3.9 (3.9-4.0)     |

<sup>1</sup>Data are presented as means (minimum-maximum value) based on three samples per product taken from different months during the study period. ARA, arachidonic acid; DPA, docosapentaenoic acid; n, omega.

## Supplementary data

**Supplemental Table 2.** Coefficients and *P*-values for the fixed effects age, sex, and BMI, and *P*-values for the meal effect from the linear mixed model<sup>1</sup>

| iAUC          | Meal<br><i>P</i> | BMI<br>coef. | BMI<br><i>P</i> | Sex <sup>2</sup><br>coef. | Sex<br><i>P</i> | Age<br>coef. | Age<br><i>P</i> |
|---------------|------------------|--------------|-----------------|---------------------------|-----------------|--------------|-----------------|
| Serum TGs     | < <b>0.001</b>   | 0.07         | 0.08            | 0.59                      | 0.05            | 0.02         | 0.20            |
| Serum TC      | 0.37             | 0.07         | <b>0.03</b>     | 0.41                      | 0.10            | -0.02        | 0.11            |
| Serum LDL-C   | 0.21             | 0.05         | <b>0.007</b>    | 0.33                      | <b>0.03</b>     | -0.02        | <b>0.01</b>     |
| Serum HDL-C   | <b>0.02</b>      | 0.03         | <b>0.03</b>     | 0.03                      | 0.78            | -0.01        | 0.10            |
| Serum insulin | <b>0.006</b>     | 31.60        | <b>0.001</b>    | -197.36                   | <b>0.007</b>    | -0.19        | 0.95            |
| Serum glucose | 0.26             | 0.09         | 0.19            | -1.03                     | <b>0.04</b>     | -0.08        | < <b>0.001</b>  |
| Serum NEFAs   | 0.06             | -0.01        | 0.54            | -0.09                     | 0.53            | -0.01        | 0.18            |
| Plasma GIP    | 0.39             | -8.56        | 0.85            | -751.31                   | <b>0.03</b>     | 29.99        | <b>0.03</b>     |

<sup>1</sup>C, cholesterol; coef, coefficient; GIP, glucose-dependent insulinotropic polypeptide; iAUC, incremental area under the curve; NEFA, non-esterified fatty acid; TC, total cholesterol.

<sup>2</sup>Men compared to women.

## Supplementary data

**Supplemental Table 3.** Coefficients and *P*-values for meal comparisons for variables with a statistically significant meal effect on TG-iAUC<sub>0-6 h</sub>, HDL-C-iAUC<sub>0-6 h</sub>, and insulin-iAUC<sub>0-6 h</sub> from the linear mixed model<sup>1</sup>

|                      |     |    | Coef.  | <i>P</i>         | <i>P</i> *       |
|----------------------|-----|----|--------|------------------|------------------|
| <b>Serum TGs</b>     |     |    |        |                  |                  |
| C                    | vs. | B  | 0.24   | 0.20             | 1                |
| WC                   | vs. | B  | -0.02  | 0.90             | 1                |
| SC                   | vs. | B  | 0.75   | <b>&lt;0.001</b> | <b>&lt;0.001</b> |
| WC                   | vs. | C  | -0.27  | 0.15             | 0.91             |
| SC                   | vs. | C  | 0.50   | <b>0.008</b>     | <b>0.05</b>      |
| SC                   | vs. | WC | 0.77   | <b>&lt;0.001</b> | <b>&lt;0.001</b> |
| <b>Serum HDL-C</b>   |     |    |        |                  |                  |
| C                    | vs. | B  | -0.09  | 0.32             | 1                |
| WC                   | vs. | B  | 0.04   | 0.68             | 1                |
| SC                   | vs. | B  | 0.18   | <b>0.04</b>      | 0.22             |
| WC                   | vs. | C  | 0.12   | 0.15             | 0.92             |
| SC                   | vs. | C  | 0.26   | <b>0.002</b>     | <b>0.01</b>      |
| SC                   | vs. | WC | 0.14   | 0.09             | 0.53             |
| <b>Serum insulin</b> |     |    |        |                  |                  |
| C                    | vs. | B  | 118.82 | <b>0.001</b>     | <b>0.006</b>     |
| WC                   | vs. | B  | 35.56  | 0.33             | 0.14             |
| SC                   | vs. | B  | 82.71  | <b>0.02</b>      | 0.13             |
| WC                   | vs. | C  | -83.27 | <b>0.02</b>      | 0.92             |
| SC                   | vs. | C  | -36.11 | 0.33             | 1                |
| SC                   | vs. | WC | 47.15  | 0.19             | 1                |

<sup>1</sup>Pairwise meal comparisons were performed by combining the appropriate regression coefficients from the linear mixed model. The coefficients represent the differences between the meals. C, cholesterol; Coef., coefficient; B, meal rich in fat from butter; C, meal rich in fat from medium-hard cheese; iAUC, incremental area under the curve; SC, meal rich in fat from sour cream; WC, meal rich in fat from whipped cream.

\*Bonferroni corrected *P*-value.
